# Supplementary material
Source: Springer Nature journal article supplement (https://www.springermedizin.de/resource/supplementary/12985_2012_1862_MOESM3_ESM.pdf/9610616)

A

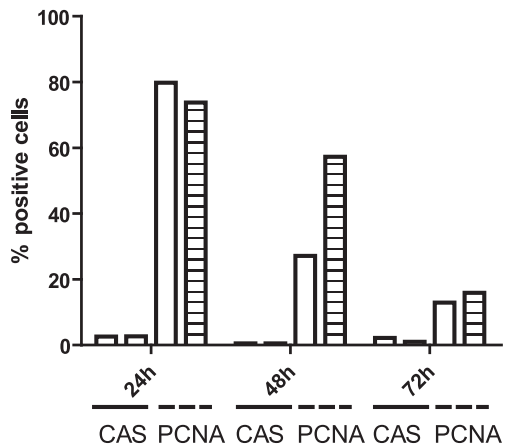

B

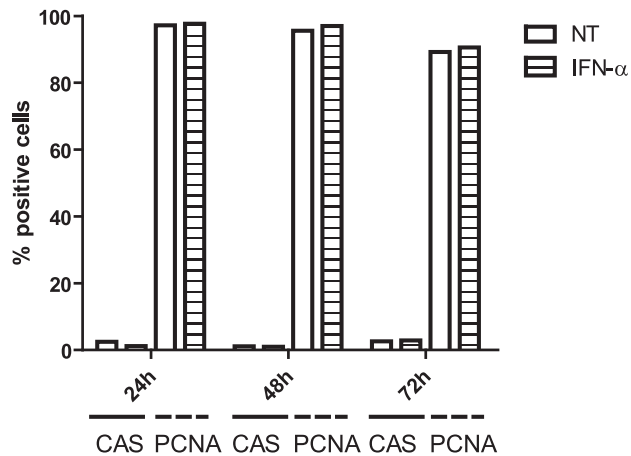

C

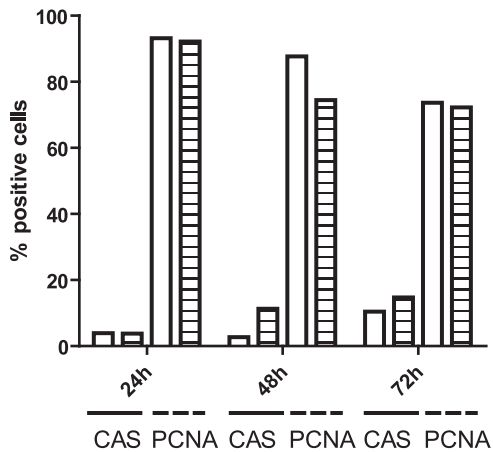

D

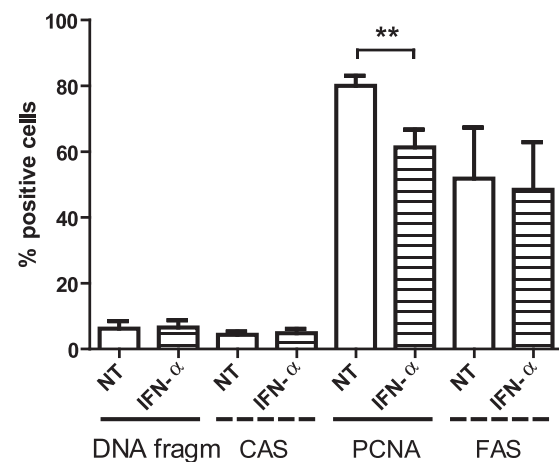

Supplement: MOESM3 [file 9610616]
